# Supplementary material for: A Robust Panel Based on Mitochondrial Localized Proteins for Prognostic Prediction of Lung Adenocarcinoma
Source: PubMed Central journal article supplement (PMC8445726; doi:10.1155/2021/7569168), 2021-09-09
Supplement: 7569168.f1.pdf [file 7569168.f1.pdf]

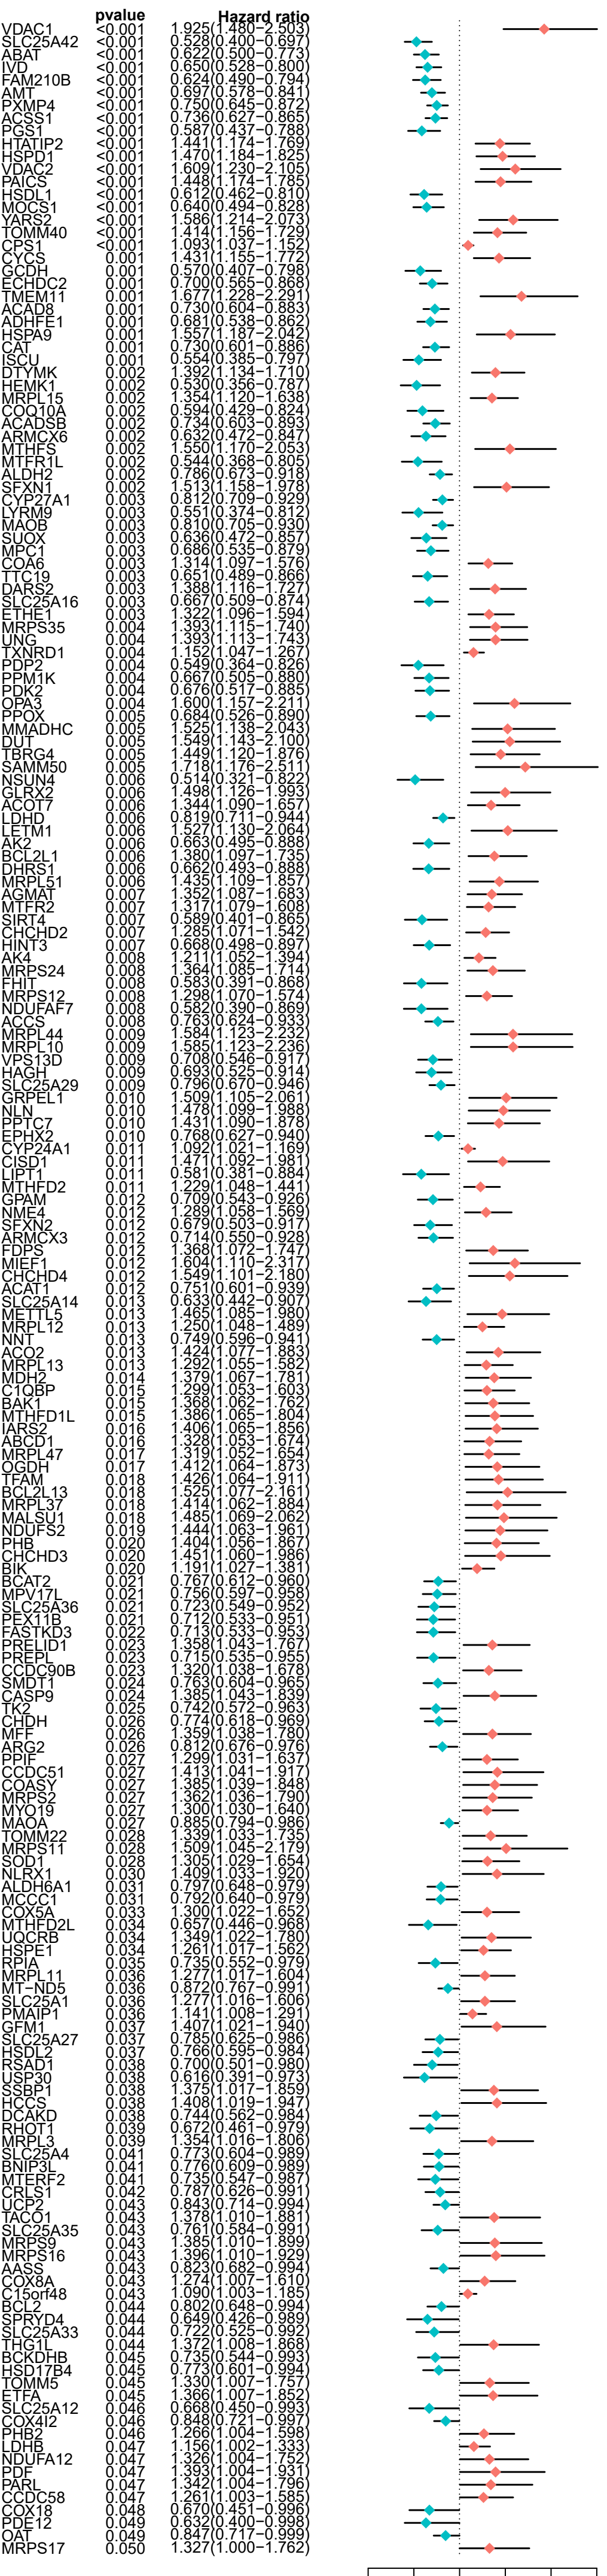

0.0 0.5 1.0 1.5 2.0 2.5  
Hazard ratio
